# Supplementary material for: Impacts of the reactants on the synthesis of ZnO particles in glycerol-based solvents
Source: Royal Society of Chemistry journal article supplement (doi:10.1039/d3nj03715k), 2024-01-01
Supplement: d3nj03715k1.pdf [file d3nj03715k1.pdf]

## SUPPORT INFORMATION

### Impacts of the reactants on the synthesis of ZnO particles in glycerol-based solvent

Thiago Galeote Tabuti<sup>a</sup>, Lorena Portela Brazuna<sup>b</sup>, Joyce Gabrielle da Silva<sup>a</sup>, Rebeca Bacani<sup>a</sup>, Rafael Garcia Candido<sup>a</sup>, Josy Antevelli Osajima Furtini<sup>c</sup>, Carolina Ramos Hurtado<sup>d</sup>, Dayane Batista Tada<sup>b</sup>, Eduardo Rezende Triboni<sup>a\*</sup>

<sup>a</sup>Escola de Engenharia de Lorena da Universidade de São Paulo, Departamento de Engenharia Química (DEQUI). Estrada Municipal do Campinho, s/nº CEP 12.602-810, Lorena, SP - Brazil. Tel: 55-12- 3159-5000.

<sup>b</sup>Universidade Federal de São Paulo, Campus São José dos Campos (UNIFESP-SJC). Rua Talim, no 1201, São José dos Campos – Brazil.

<sup>c</sup>LIMAV, Interdisciplinary Laboratory for Advanced Materials, Ministro Petronio Portela, Federal University of Piauí, Teresina 64049-550, Piauí, Brazil.

<sup>d</sup>Instituto Federal de São Paulo, Campus São José dos Campos (IFSP-SJC). Rodovia Presidente Dutra, km 145 – s/n – São José dos Campos – SP – Brazil.

*\*Corresponding Author.*

E-mail: [tribonier@usp.br](mailto:tribonier@usp.br)

## SI-1. Tables

**Table S1:** Rietveld refinement results\*. Phase/Space group, lattice parameters (a, b, c), lattice volume (V), ZnO phase average crystallite size ( $D_{ZnO}$ ) calculated by Highscore\*\*, TEM images average particle size ( $D_{TEM}$ ), microstrain percentage ( $\epsilon_{ZnO}$ ). Rietveld converge R values ( $R_{exp}$ ,  $R_p$ ,  $R_{wp}$ , and  $X^2$ ) for different mole ratios of  $Zn^{2+}:HO^-$ .

| Base / Temperature | Phase weight % (Space group)                                                                                 | a, b, c (Å)                               | V (Å <sup>3</sup> ) | $D_{ZnO}$ (nm) | $D_{TEM}$ (nm) | $\epsilon_{ZnO}$ % | R values                                                          |
|--------------------|--------------------------------------------------------------------------------------------------------------|-------------------------------------------|---------------------|----------------|----------------|--------------------|-------------------------------------------------------------------|
| 1:0.5<br>25°C      | ZnO hexagonal (P63mc) 15.4%                                                                                  | a=b=3.2518(4)<br>c=5.2116(9)              | 47.7(5)             | 28.9(5)        | 38(10)         | 0.009(3)           | $R_{exp}$ =8.07                                                   |
|                    | Zn <sub>5</sub> (OH) <sub>8</sub> (NO <sub>3</sub> ) <sub>x</sub> H <sub>2</sub> O monoclinic (C12/m1) 84.6% | a=19.509(4)<br>b=6.253(11)<br>c=5.5237(7) | 672.9(7)            | 36.4(3)        |                |                    | $R_p$ =12.74<br>$R_{wp}$ =16.13<br>$X^2$ = 1.99                   |
| 1:0.5<br>70°C      | Zn <sub>5</sub> (OH) <sub>8</sub> (NO <sub>3</sub> ) <sub>x</sub> H <sub>2</sub> O orthorhombic (Imm2) 13.0% | a=6.73(2)<br>b=21.82(3)<br>c=3.173(9)     | 466.2(7)            | 34(2)          | 37(5)          | 1.17(8)            | $R_{exp}$ =8.16<br>$R_p$ =9.19                                    |
|                    | ZnO hexagonal (P63mc) 46.3%                                                                                  | a=b=3.2552(6)<br>c=5.2108(9)              | 47.82(5)            | 16(1)          |                |                    | $R_{wp}$ =12.00<br>$X^2$ = 1.47                                   |
| 1:1<br>25°C        | Zn <sub>5</sub> (OH) <sub>10</sub> xH <sub>2</sub> O monoclinic (C12/c1) 40.7%                               | a=15.388(3)<br>b=6.22(2)<br>c=10.992(9)   | 1032.1(5)           | 4(1)           | 124*(60)       | ~0                 | $R_{wp}$ =12.00<br>$X^2$ = 1.47                                   |
|                    | ZnO hexagonal (P63mc) 88.3%                                                                                  | a=b=3.2559(9)<br>c=5.2144(3)              | 48.87(7)            | 83(5)          |                |                    | $R_{exp}$ =5.36<br>$R_p$ =7.14<br>$R_{wp}$ =9.39<br>$X^2$ = 1.75  |
| 1:1<br>70°C        | ZnO hexagonal (P63mc) 100%                                                                                   | a=b=3.2533(3)<br>c=5.2122(6)              | 47.77(3)            | 16(1)          | 12(3)          | 0.304(9)           | $R_{exp}$ =5.47<br>$R_p$ =6.78<br>$R_{wp}$ =9.09<br>$X^2$ = 1.66  |
| 1:1.5<br>25°C      | ZnO hexagonal (P63mc) 100%                                                                                   | a=b=3.2556(6)<br>c=5.2136(3)              | 47.85(2)            | 27.9(4)        | 31(15)         | 0.132(3)           | $R_{exp}$ =5.36<br>$R_p$ =8.33<br>$R_{wp}$ =12.49<br>$X^2$ = 2.21 |
| 1:1.5<br>70°C      | ZnO hexagonal (P63mc) 100%                                                                                   | a=b=3.2542(3)<br>c=5.2131(5)              | 47.81(6)            | 21.6(5)        | 12(4)          | 0.252(4)           | $R_{exp}$ =5.22<br>$R_p$ =6.56<br>$R_{wp}$ =8.56<br>$X^2$ = 1.64  |

\*The deviations were calculated by the Rietveld method and are presented between ( ), i.e.  $2.78 \pm 0.04$  nm is 2.78(4) nm. \*\* Highscore software calculates the average crystallite size and microstrain by the Williamson-Hall Method.

**Table S2:** Rietveld refinement results\*. Phase/Space group, lattice parameters (a, b, c), lattice volume (V), ZnO phase average crystallite size ( $D_{ZnO}$ ) calculated by Highscore\*\*, TEM images average particle size ( $D_{TEM}$ ), microstrain percentage ( $\epsilon_{ZnO}$ ). Rietveld convergence R values ( $R_{exp}$ ,  $R_p$ ,  $R_{wp}$ , and  $X^2$ ) for different urea substitutes and glycerol-NH<sub>3</sub> bubbling method.

| Solvents                 | Phase weight %<br>(Space group)                                                                                    | a, b, c<br>(Å)                     | V<br>(Å <sup>3</sup> ) | $D_{ZnO}$<br>(nm) | $D_{TEM}$<br>(nm)            | $\epsilon_{ZnO}$<br>% | R values                                       |
|--------------------------|--------------------------------------------------------------------------------------------------------------------|------------------------------------|------------------------|-------------------|------------------------------|-----------------------|------------------------------------------------|
| TU - Tiourea             | ZnS cubic<br>(F4-3m) 100%                                                                                          | a=b=c=<br>5.358(4)                 | 153.86(5)              | 3.7(3)            | -                            | 0.771(8)              | $R_{exp}$ =5.74                                |
|                          |                                                                                                                    |                                    |                        |                   |                              |                       | $R_p$ =6.01                                    |
|                          |                                                                                                                    |                                    |                        |                   |                              |                       | $R_{wp}$ =7.73<br>$X^2$ = 1.54                 |
| DMU -<br>Dimethylurea    | ZnO hexagonal<br>(P63mc) 88.3%                                                                                     | a=b=3.2578(4)<br>c=5.2148(7)       | 47.93(7)               | 16.6(5)           | 24(8)                        | 0.353(4)              | $R_{exp}$ =5.19                                |
|                          |                                                                                                                    |                                    |                        |                   |                              |                       | $R_p$ =6.09                                    |
|                          |                                                                                                                    |                                    |                        |                   |                              |                       | $R_{wp}$ =7.73<br>$X^2$ = 1.49                 |
| TMU -<br>Tetramethylurea | ZnO hexagonal<br>(P63mc) 51.5%                                                                                     | a=b=3.2557(5)<br>c=5.2104(6)       | 47.83(9)               | 20.6(3)           | 20(5)                        | 0.353(9)              | $R_{exp}$ =5.11                                |
|                          |                                                                                                                    |                                    |                        |                   |                              |                       | $R_p$ =5.64                                    |
|                          |                                                                                                                    |                                    |                        |                   |                              |                       | $R_{wp}$ =7.19<br>$X^2$ = 1.40                 |
| Glycerol:Amonia          | ZnO hexagonal<br>(P63mc) 86.3%                                                                                     | a=b=3.2510(5)<br>c=5.2103(2)       | 47.7(2)                | 47(5)             | ~50 nm<br>(rod<br>thickness) | 0.402(3)              | $R_{exp}$ =3.42                                |
|                          |                                                                                                                    |                                    |                        |                   |                              |                       | $R_p$ =7.89<br>$R_{wp}$ =11.45<br>$X^2$ = 3.34 |
|                          | Zn <sub>5</sub> (OH) <sub>8</sub> (NO <sub>3</sub> ) <sub>x</sub> H <sub>2</sub> O<br>monoclinic<br>(C12/m1) 13.4% | a=b=3.2528(1<br>2)<br>c=5.2215(23) | 670.6(5)               | 17(3)             |                              | 0.402(3)              |                                                |

\*The deviations were calculated by the Rietveld method and are presented between ( ), i.e.  $2.78 \pm 0.04$  nm is 2.78(4) nm.\*\* Highscore software calculates the average crystallite size and microstrain by the Williamson-Hall Method.

**Table S3:** Rietveld refinement results\*. Phase/Space group, lattice parameters (a, b, c), lattice volume (V), ZnO phase average crystallite size ( $D_{\text{ZnO}}$ )\*\*, microstrain percentage ( $\epsilon_{\text{ZnO}}$ ). Rietveld convergence R values ( $R_{\text{exp}}$ ,  $R_p$ ,  $R_{\text{wp}}$ , and  $\chi^2$ ) for different mole ratios of G:I variations.

| Glycerol:<br>Isopropanol<br>(G:I) | Phase<br>weight %<br>(Space<br>group) | a, b, c<br>(Å)               | V<br>(Å <sup>3</sup> ) | $D_{\text{ZnO}}$<br>(nm) | $\epsilon_{\text{ZnO}}$<br>% | R values                                                                       |
|-----------------------------------|---------------------------------------|------------------------------|------------------------|--------------------------|------------------------------|--------------------------------------------------------------------------------|
| 1:1                               | ZnO<br>hexagonal<br>(P63mc)<br>100%   | a=b=3.2534(4)<br>c=5.2145(7) | 47.78(5)               | 25.5(8)                  | 0.3420(11)                   | $R_{\text{exp}}=8.69$<br>$R_p=12.03$<br>$R_{\text{wp}}=16.55$<br>$\chi^2=1.91$ |
| 2:1                               | ZnO<br>hexagonal<br>(P63mc)<br>100%   | a=b=3.2534(4)<br>c=5.2145(7) | 47.74(3)               | 33.25(10)                | 0.2190(6)                    | $R_{\text{exp}}=8.66$<br>$R_p=11.23$<br>$R_{\text{wp}}=15.90$<br>$\chi^2=1.84$ |
| 10:1                              | ZnO<br>hexagonal<br>(P63mc)<br>100%   | a=b=3.2534(4)<br>c=5.2145(7) | 47.57(7)               | 37.11(5)                 | 0.065(4)                     | $R_{\text{exp}}=3.55$<br>$R_p=4.29$<br>$R_{\text{wp}}=5.94$<br>$\chi^2=1.68$   |

\*The deviations were calculated by the Rietveld method and are presented between ( ), i.e.  $2.78 \pm 0.04$  nm is 2.78(4) nm. \*\* Highscore software calculates the average crystallite size and microstrain by the Williamson-Hall Method.

Note that Highscore software calculates the average crystallite size from the average minimum diffraction planes from the samples, which generates the broadening of the diffraction peaks profile. Sometimes, for nanoparticles, we can compare TEM images with the calculated average crystallite size by XRD. In this case, SEM images tend to show larger agglomerates which can be difficult to compare.

## SI-2 Schemes and Pictures

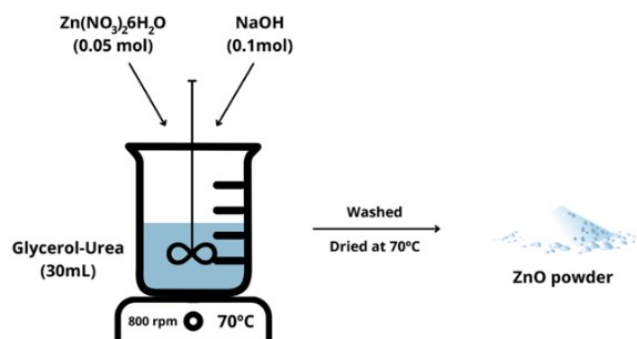

**Fig. S1.** General procedure to synthesize ZnO nanoparticles in glycerol-urea:

**Fig.S2.** Images of the gels in the preparations at varying glycerol-isopropanol mole ratios: (a)

1:1, (b) 2:1, (3) 10:1:

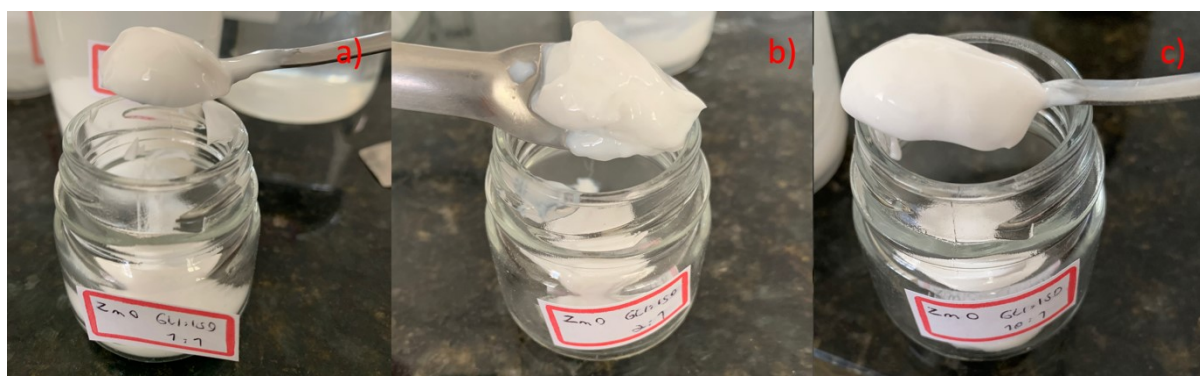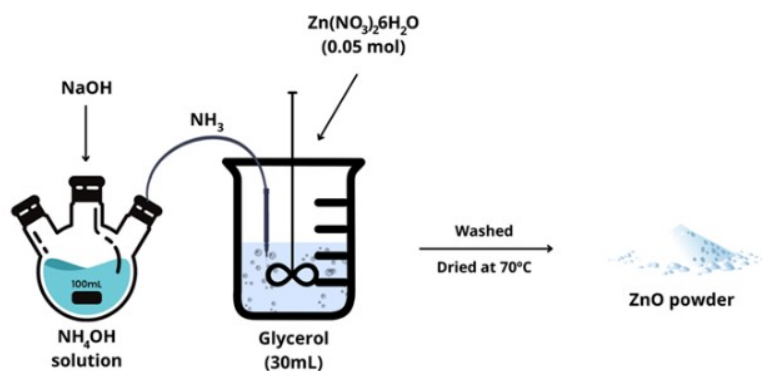

**Fig. S3.** Synthesis of the ZnO needles by bubbling ammonia

### SI 3 – Histograms

Histograms were obtained by measuring all TEM images for the samples on ImageJ Software. The average TEM size was obtained by simple statistics and maximum and minimum values were also displayed below.

**Fig.S4.** Average size histograms of ZnO TEM images for different mole ratios of  $Zn^{2+}:HO^-$ . Preparations in the GU solvent.

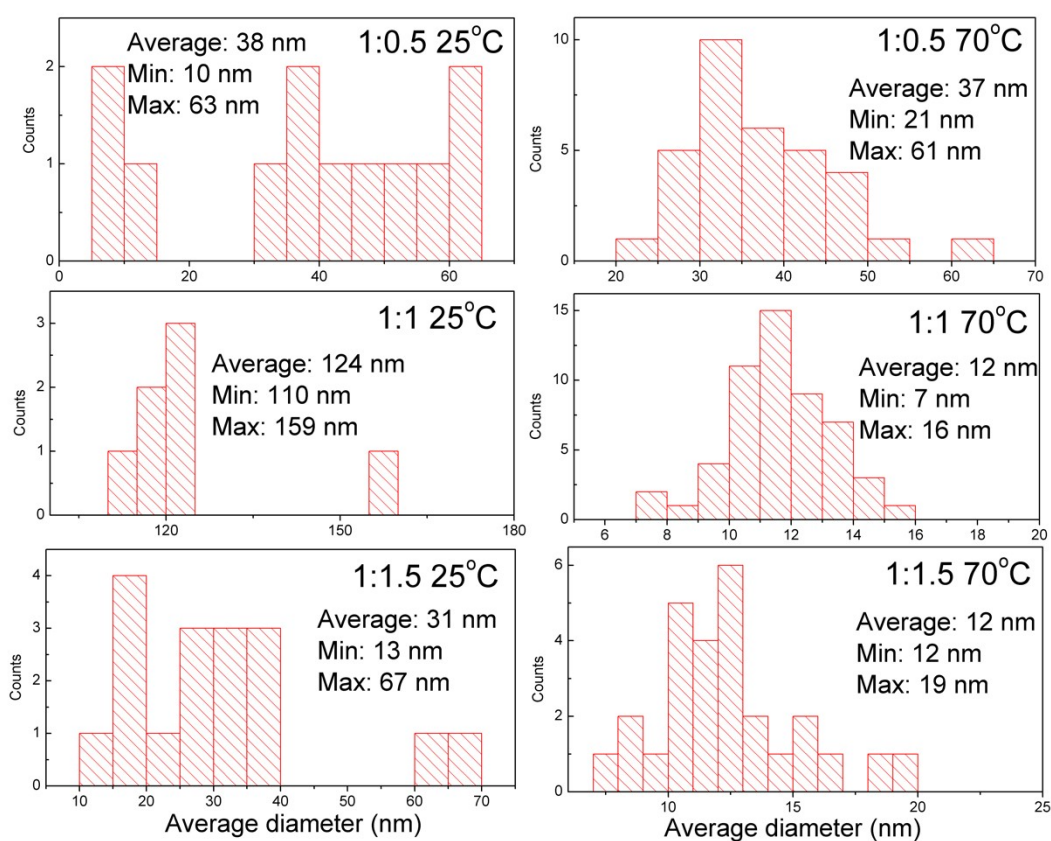

#### SI-4 UV-Vis characterization

UV-Vis spectra were measured in an Shimadzu 1900 equipment by using 2 mg of ZnO nanoparticles suspended in 10 mL of isopropanol prepared in a ultrasonic bath for 10 min. The spectra were acquired with 3 mL of each sample placed in quartz cuvettes of 10.0 mm optical path.

**Fig.S5.** UV-vis spectra of the ZnO particles obtained in (a) different  $Zn^{2+}:HO^-$  mole ratios and temperatures, and (b) at varying glycerol:isopropanol mole proportion.

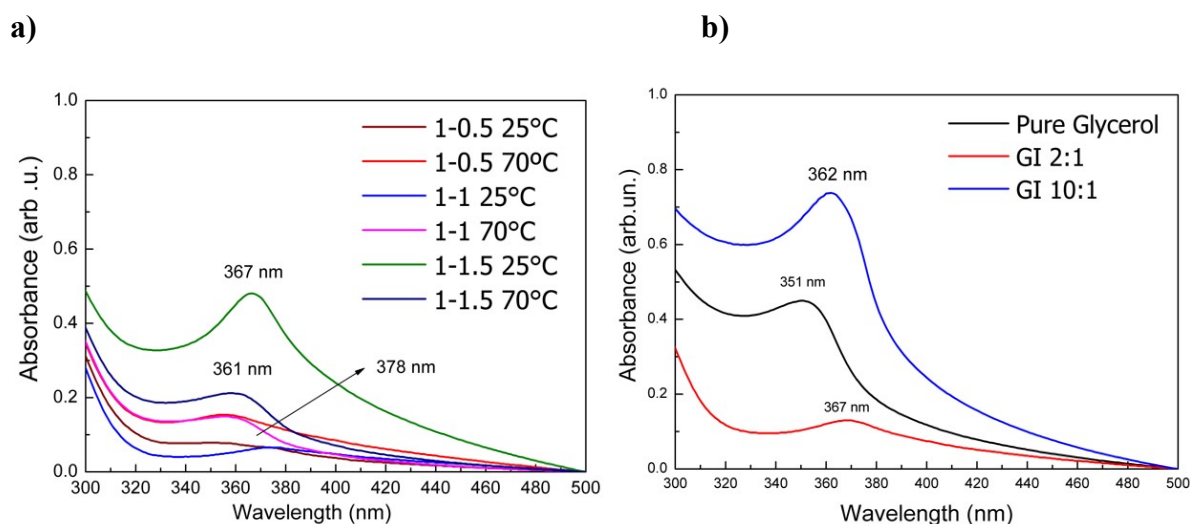

#### SI 5 – SEM and TEM images

**Fig.S6.** SEM images of ZnO particles synthesized in the pure glycerol solvent

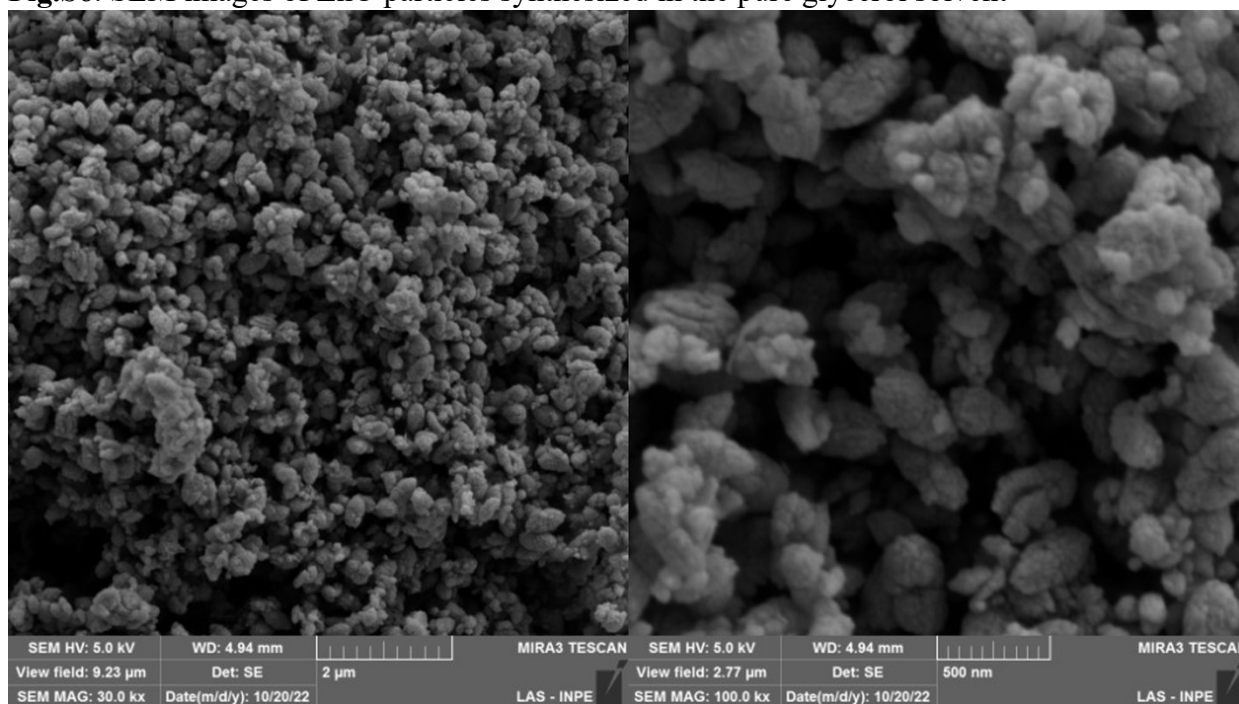

**Fig.S7.** TEM images of ZnO particles synthesized in the G:I 10:1 mole ratio.

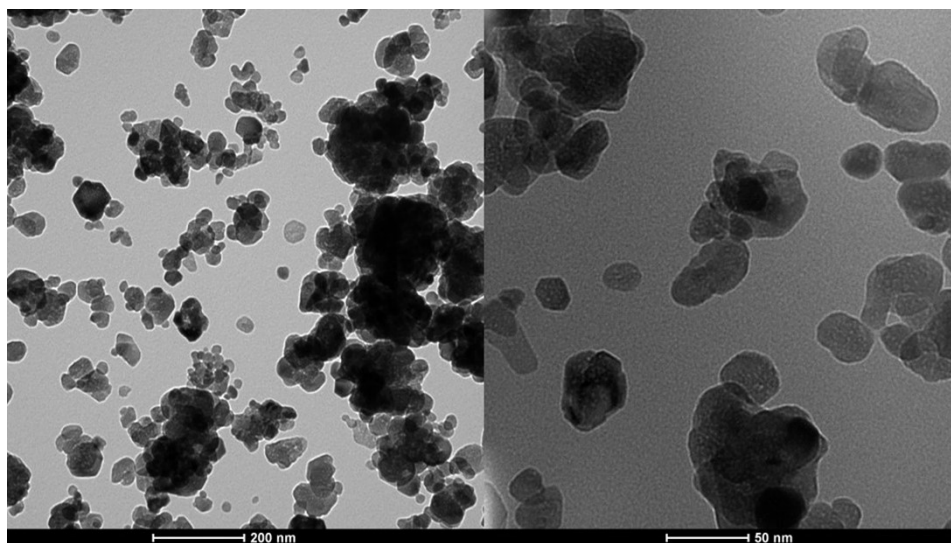

This proportion of solvent represents a synthesis limit, above this condition the particles begin to become larger and more dispersed.
