# Supplementary material for: Impacts of the reactants on the synthesis of ZnO particles in glycerol-based solvents
Source: Royal Society of Chemistry journal article supplement (doi:10.1039/d3nj03715k), 2024-01-01
Supplement: d3nj03715k4.pdf [file d3nj03715k4.pdf]

Electronic Supplementary Material (ESI) for *New Journal of Chemistry*.

This journal is © The Royal Society of Chemistry and the Centre National de la Recherche Scientifique 2024
