# Supplementary figures and images for: Impacts of the reactants on the synthesis of ZnO particles in glycerol-based solvents
Source: Royal Society of Chemistry journal article supplement (doi:10.1039/d3nj03715k), 2024-01-01

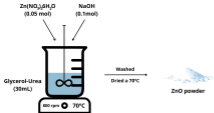

Supplement: d3nj03715k3.pdf [file d3nj03715k3.pdf]

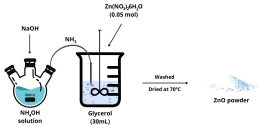

Supplement: d3nj03715k5.pdf [file d3nj03715k5.pdf]

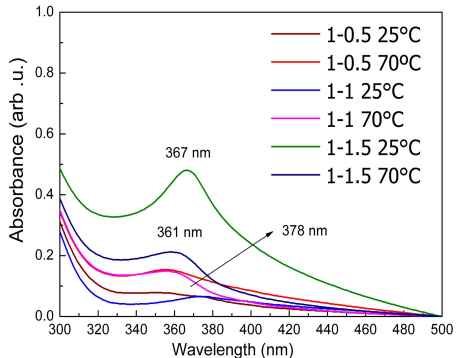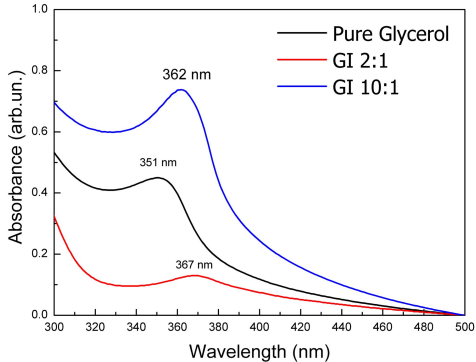

Supplement: d3nj03715k7.pdf [file d3nj03715k7.pdf]

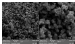

Supplement: d3nj03715k8.pdf [file d3nj03715k8.pdf]

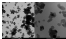

Supplement: d3nj03715k9.pdf [file d3nj03715k9.pdf]
